# Supplementary material for: Interaction of an anticancer drug, gefitinib with human serum albumin: insights from fluorescence spectroscopy and computational modeling analysis
Source: Royal Society of Chemistry journal article supplement (doi:10.1039/c6ra12019a), 2016-01-01

**Supplementary Fig. 1.** (A) UV-vis absorption spectra of 15  $\mu\text{M}$  HSA in the absence (spectrum 1) and presence (spectra 2–11) of increasing GEF concentrations (5–50  $\mu\text{M}$  with 5  $\mu\text{M}$  intervals). The spectra were obtained in 60 mM sodium phosphate buffer, pH 7.4 at 25  $^{\circ}\text{C}$ . (B) UV-vis absorption spectra of pure GEF solutions at increasing concentrations (5–50  $\mu\text{M}$  with 5  $\mu\text{M}$  intervals).

Supplementary Fig. 1.

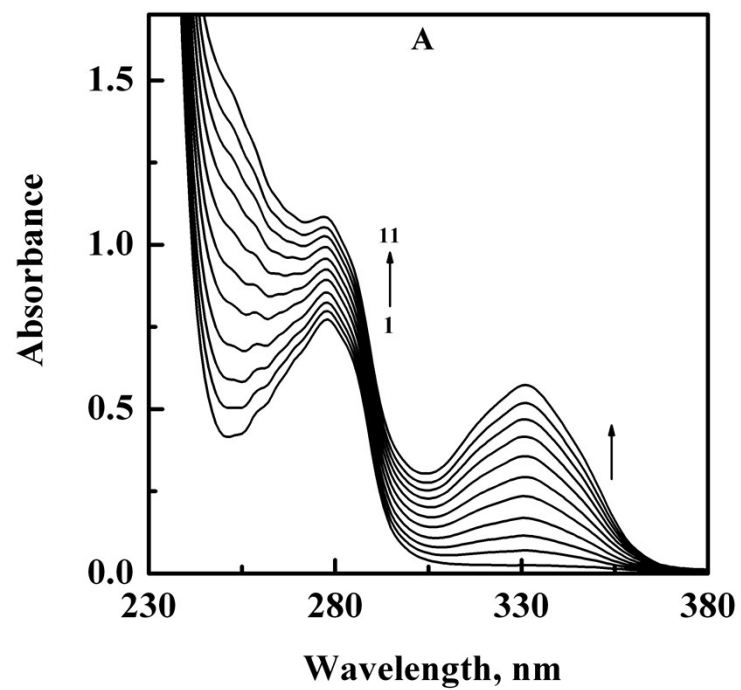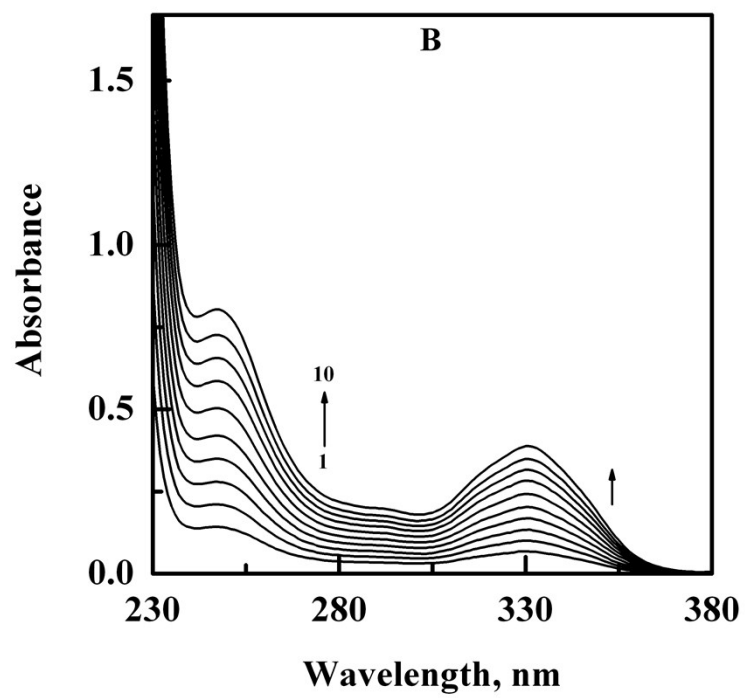

Supplement: c6ra12019a1.pdf [file c6ra12019a1.pdf]
